# Supplementary material for: Ubiquitin-Specific Peptidase 9X Inhibition for Antitumor Immunity Via Programmed Death Ligand 1 Ubiquitination and T-Cell Activation
Source: Research Square preprint supplement (doi:10.21203/rs.3.rs-8389931/v1), 2025-12-25
Supplement: Supplementary file 2 [file 4d92fa913c05b3e5c2ff623b.docx]

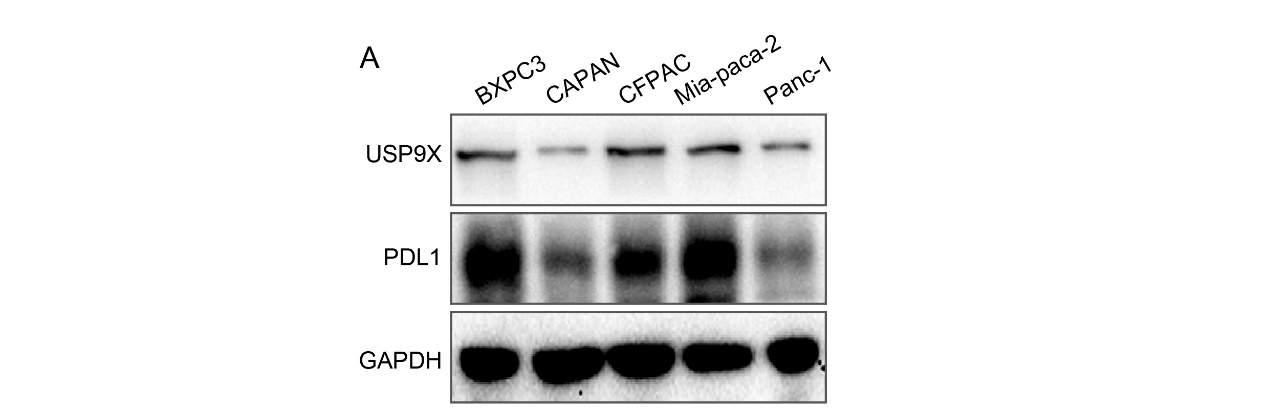


**Figure S1 USP9X is positively correlated with PD-L1 expression in different PDAC cell lines**

Protein expression of USP9X and PDL1 in PDAC cells were measured by western blotting.


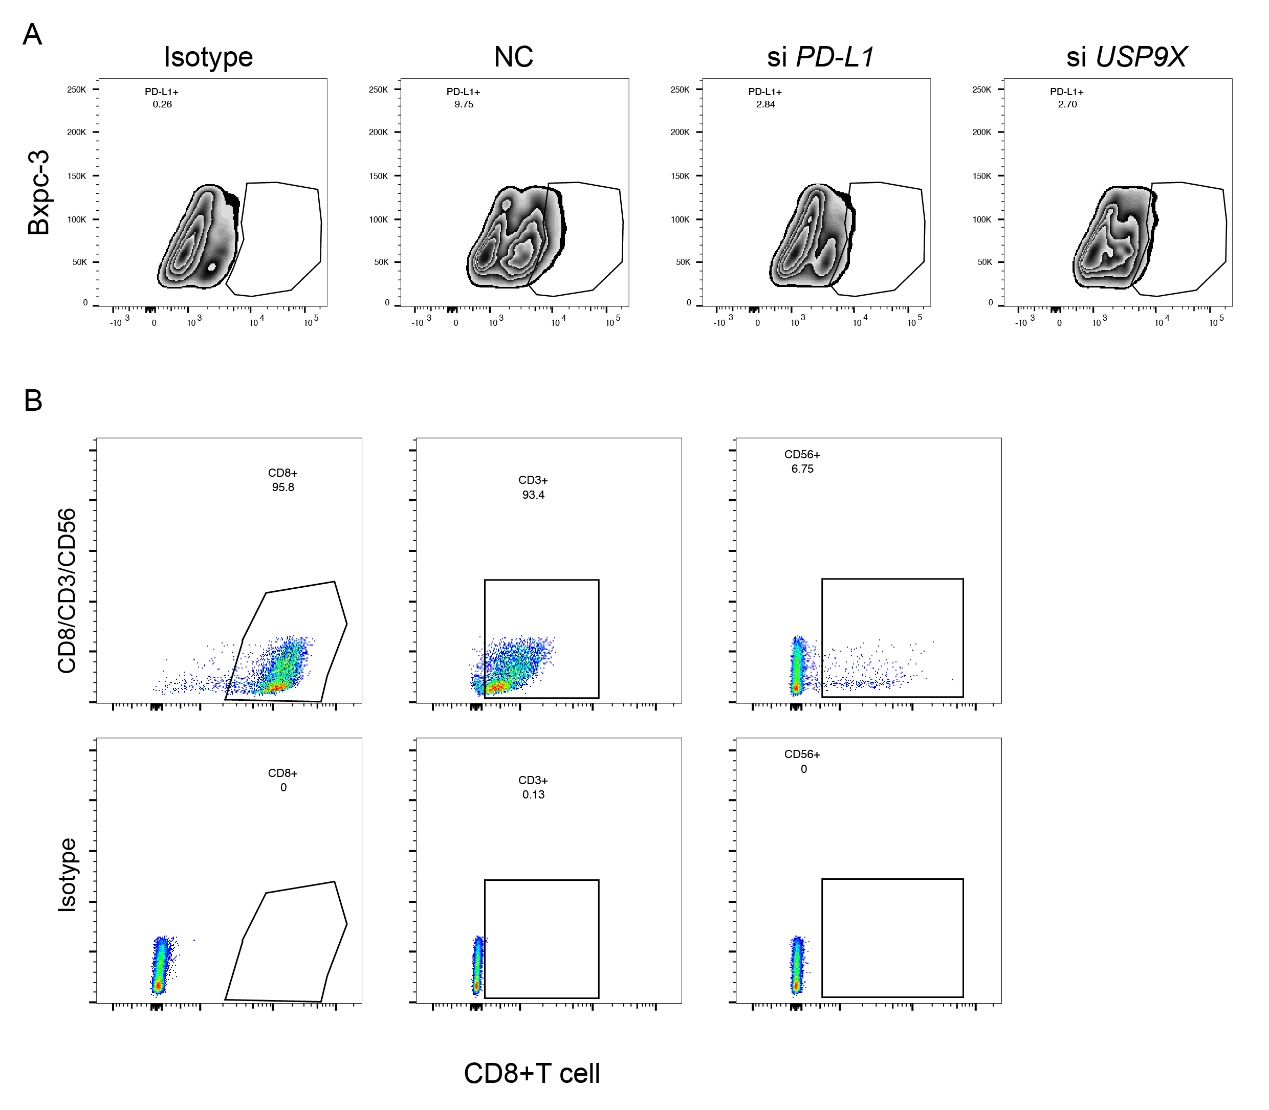


**Figure S2 Inhibition of USP9X enhanced the anti-tumor effect of T cells**

A. Targeted intervention of related protein expression in PDAC.

B. Sorting and identification of CD8+ T cell. Peripheral blood T cells were activated by CD3/CD28 stimulation *in vitro* and identified by flow cytometry.


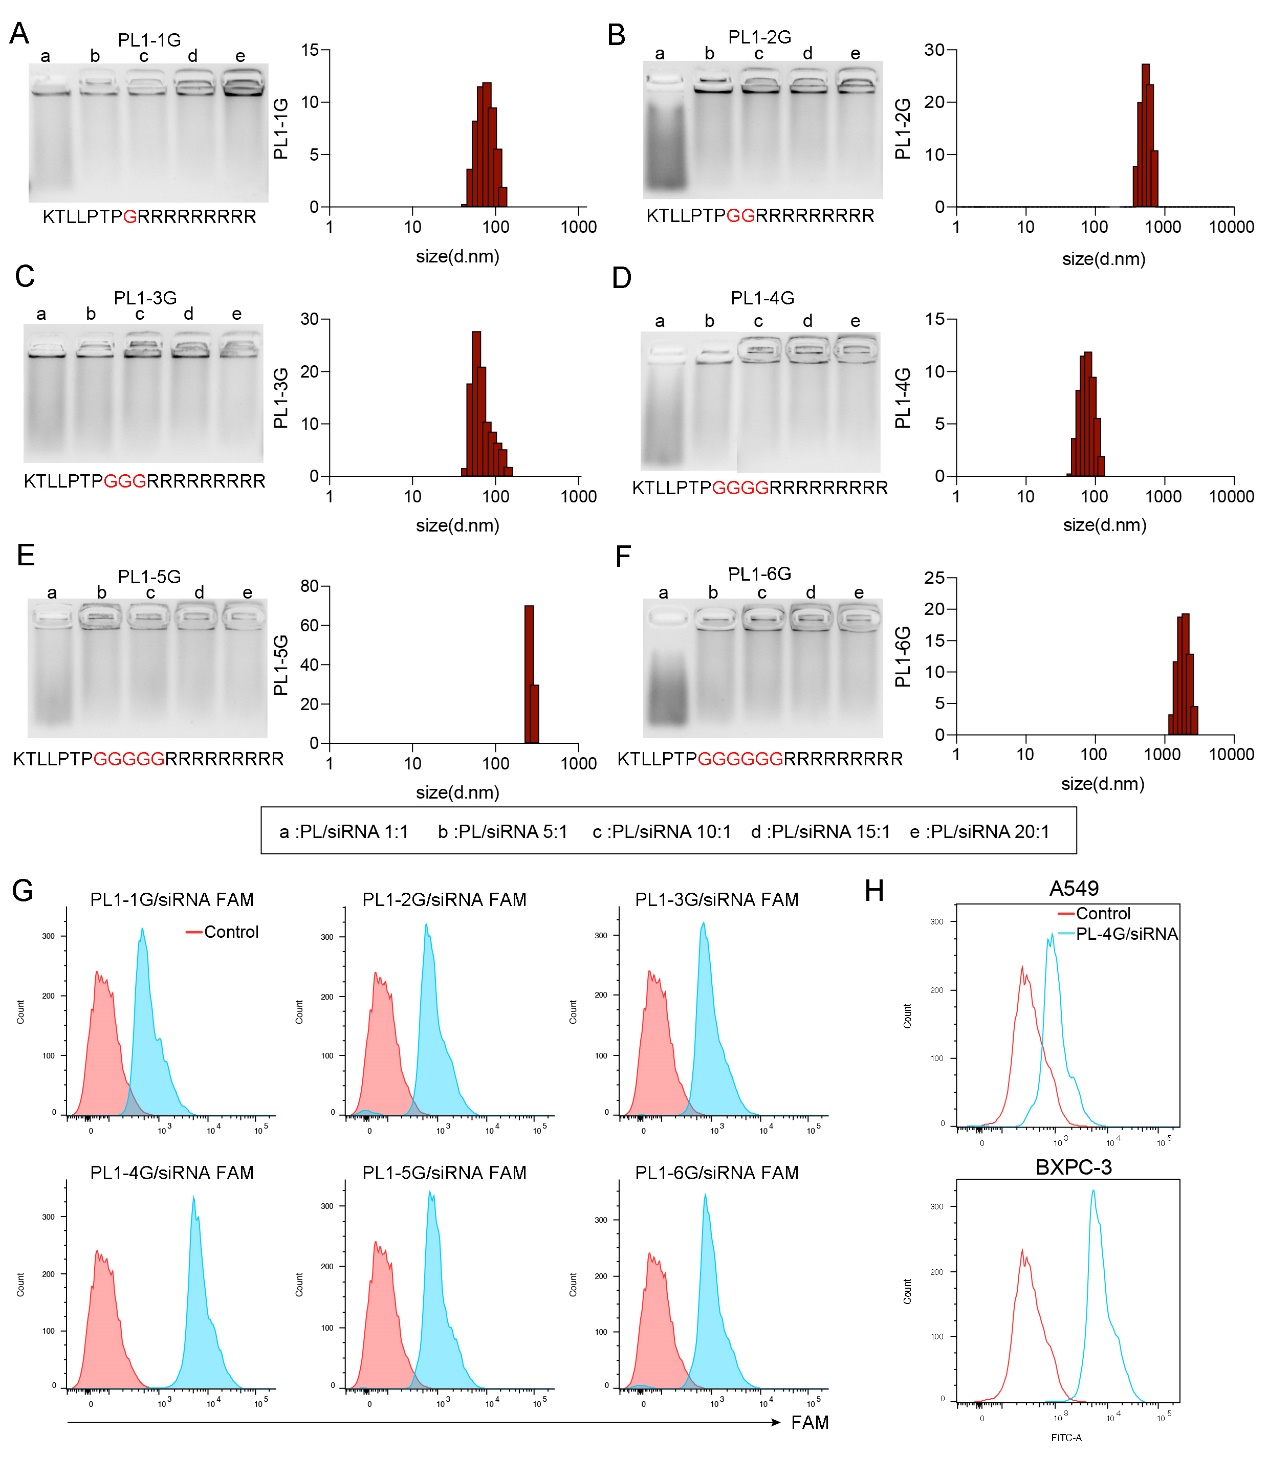


**Figure S3 Characterization of peptide nanoparticles**

A-F. Binding sizes of peptides with different lengths to siRNA.

G. Fluorescence intensity of different binding peptides.

H. Transfection efficiency of self-assembling peptides in various cell types.
