# Supplementary figures and images for: Ubiquitin-Specific Peptidase 9X Inhibition for Antitumor Immunity Via Programmed Death Ligand 1 Ubiquitination and T-Cell Activation
Source: Research Square preprint supplement (doi:10.21203/rs.3.rs-8389931/v1), 2025-12-25

F2 B


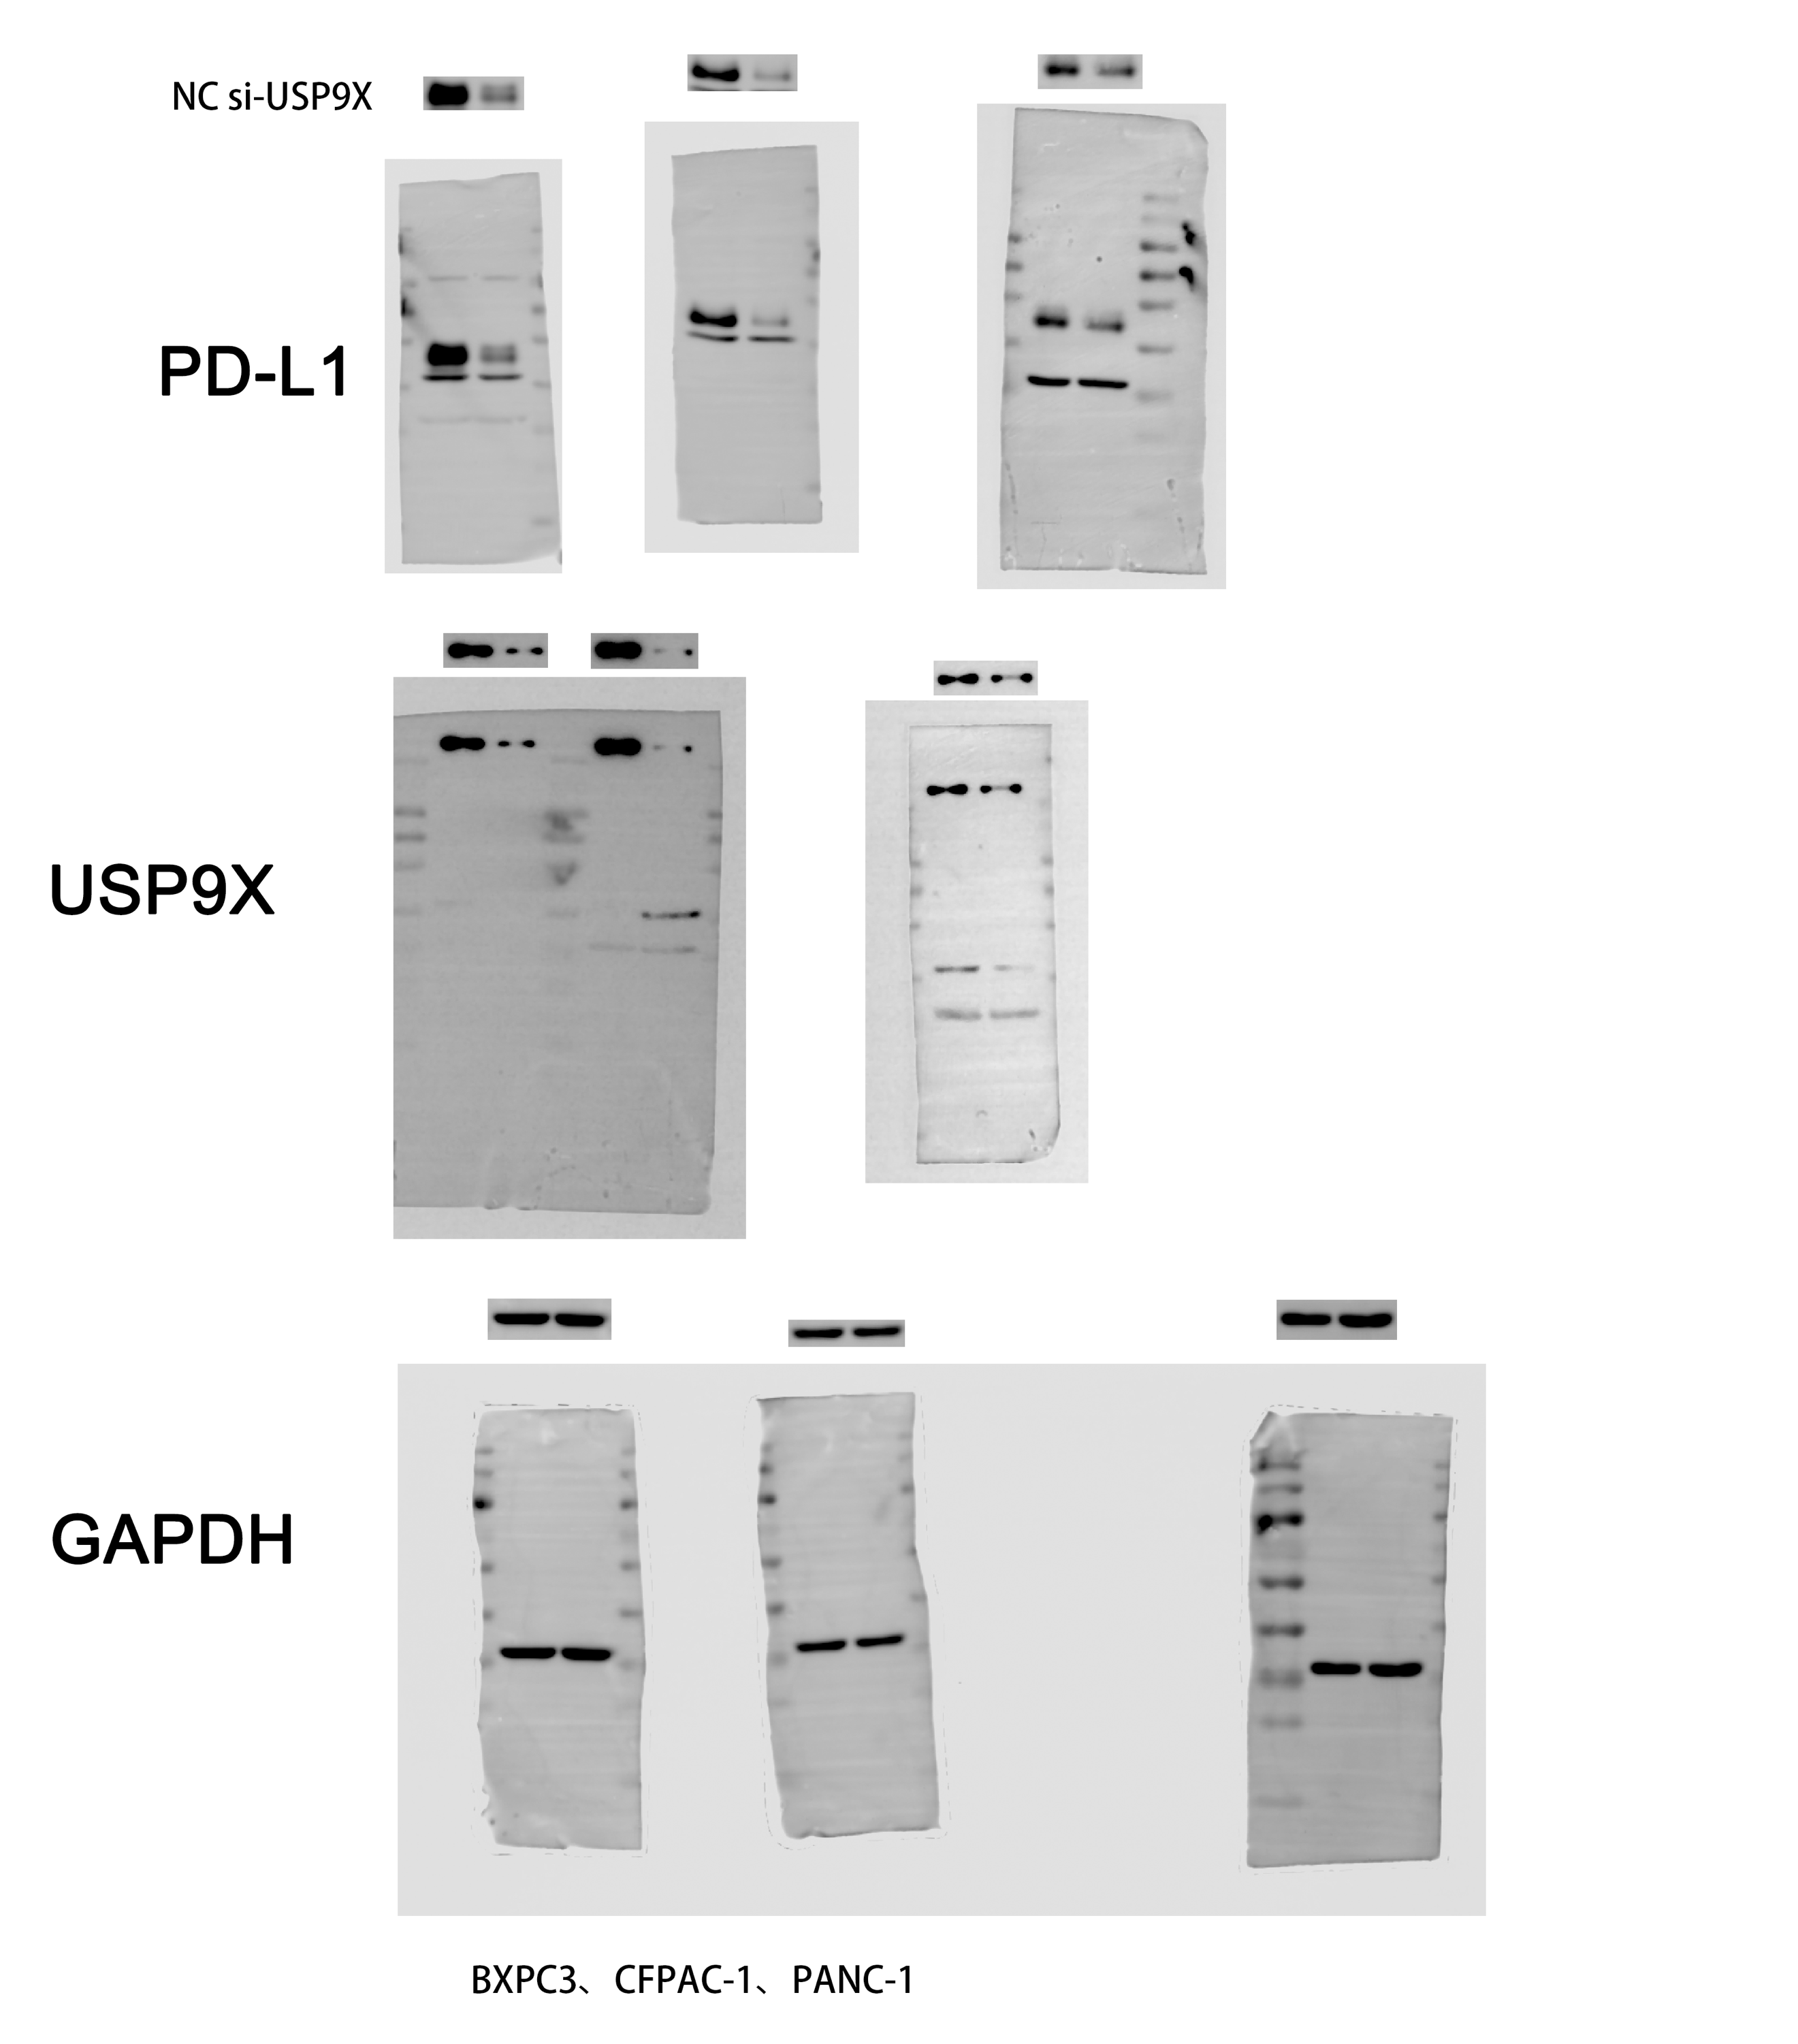


F2 D


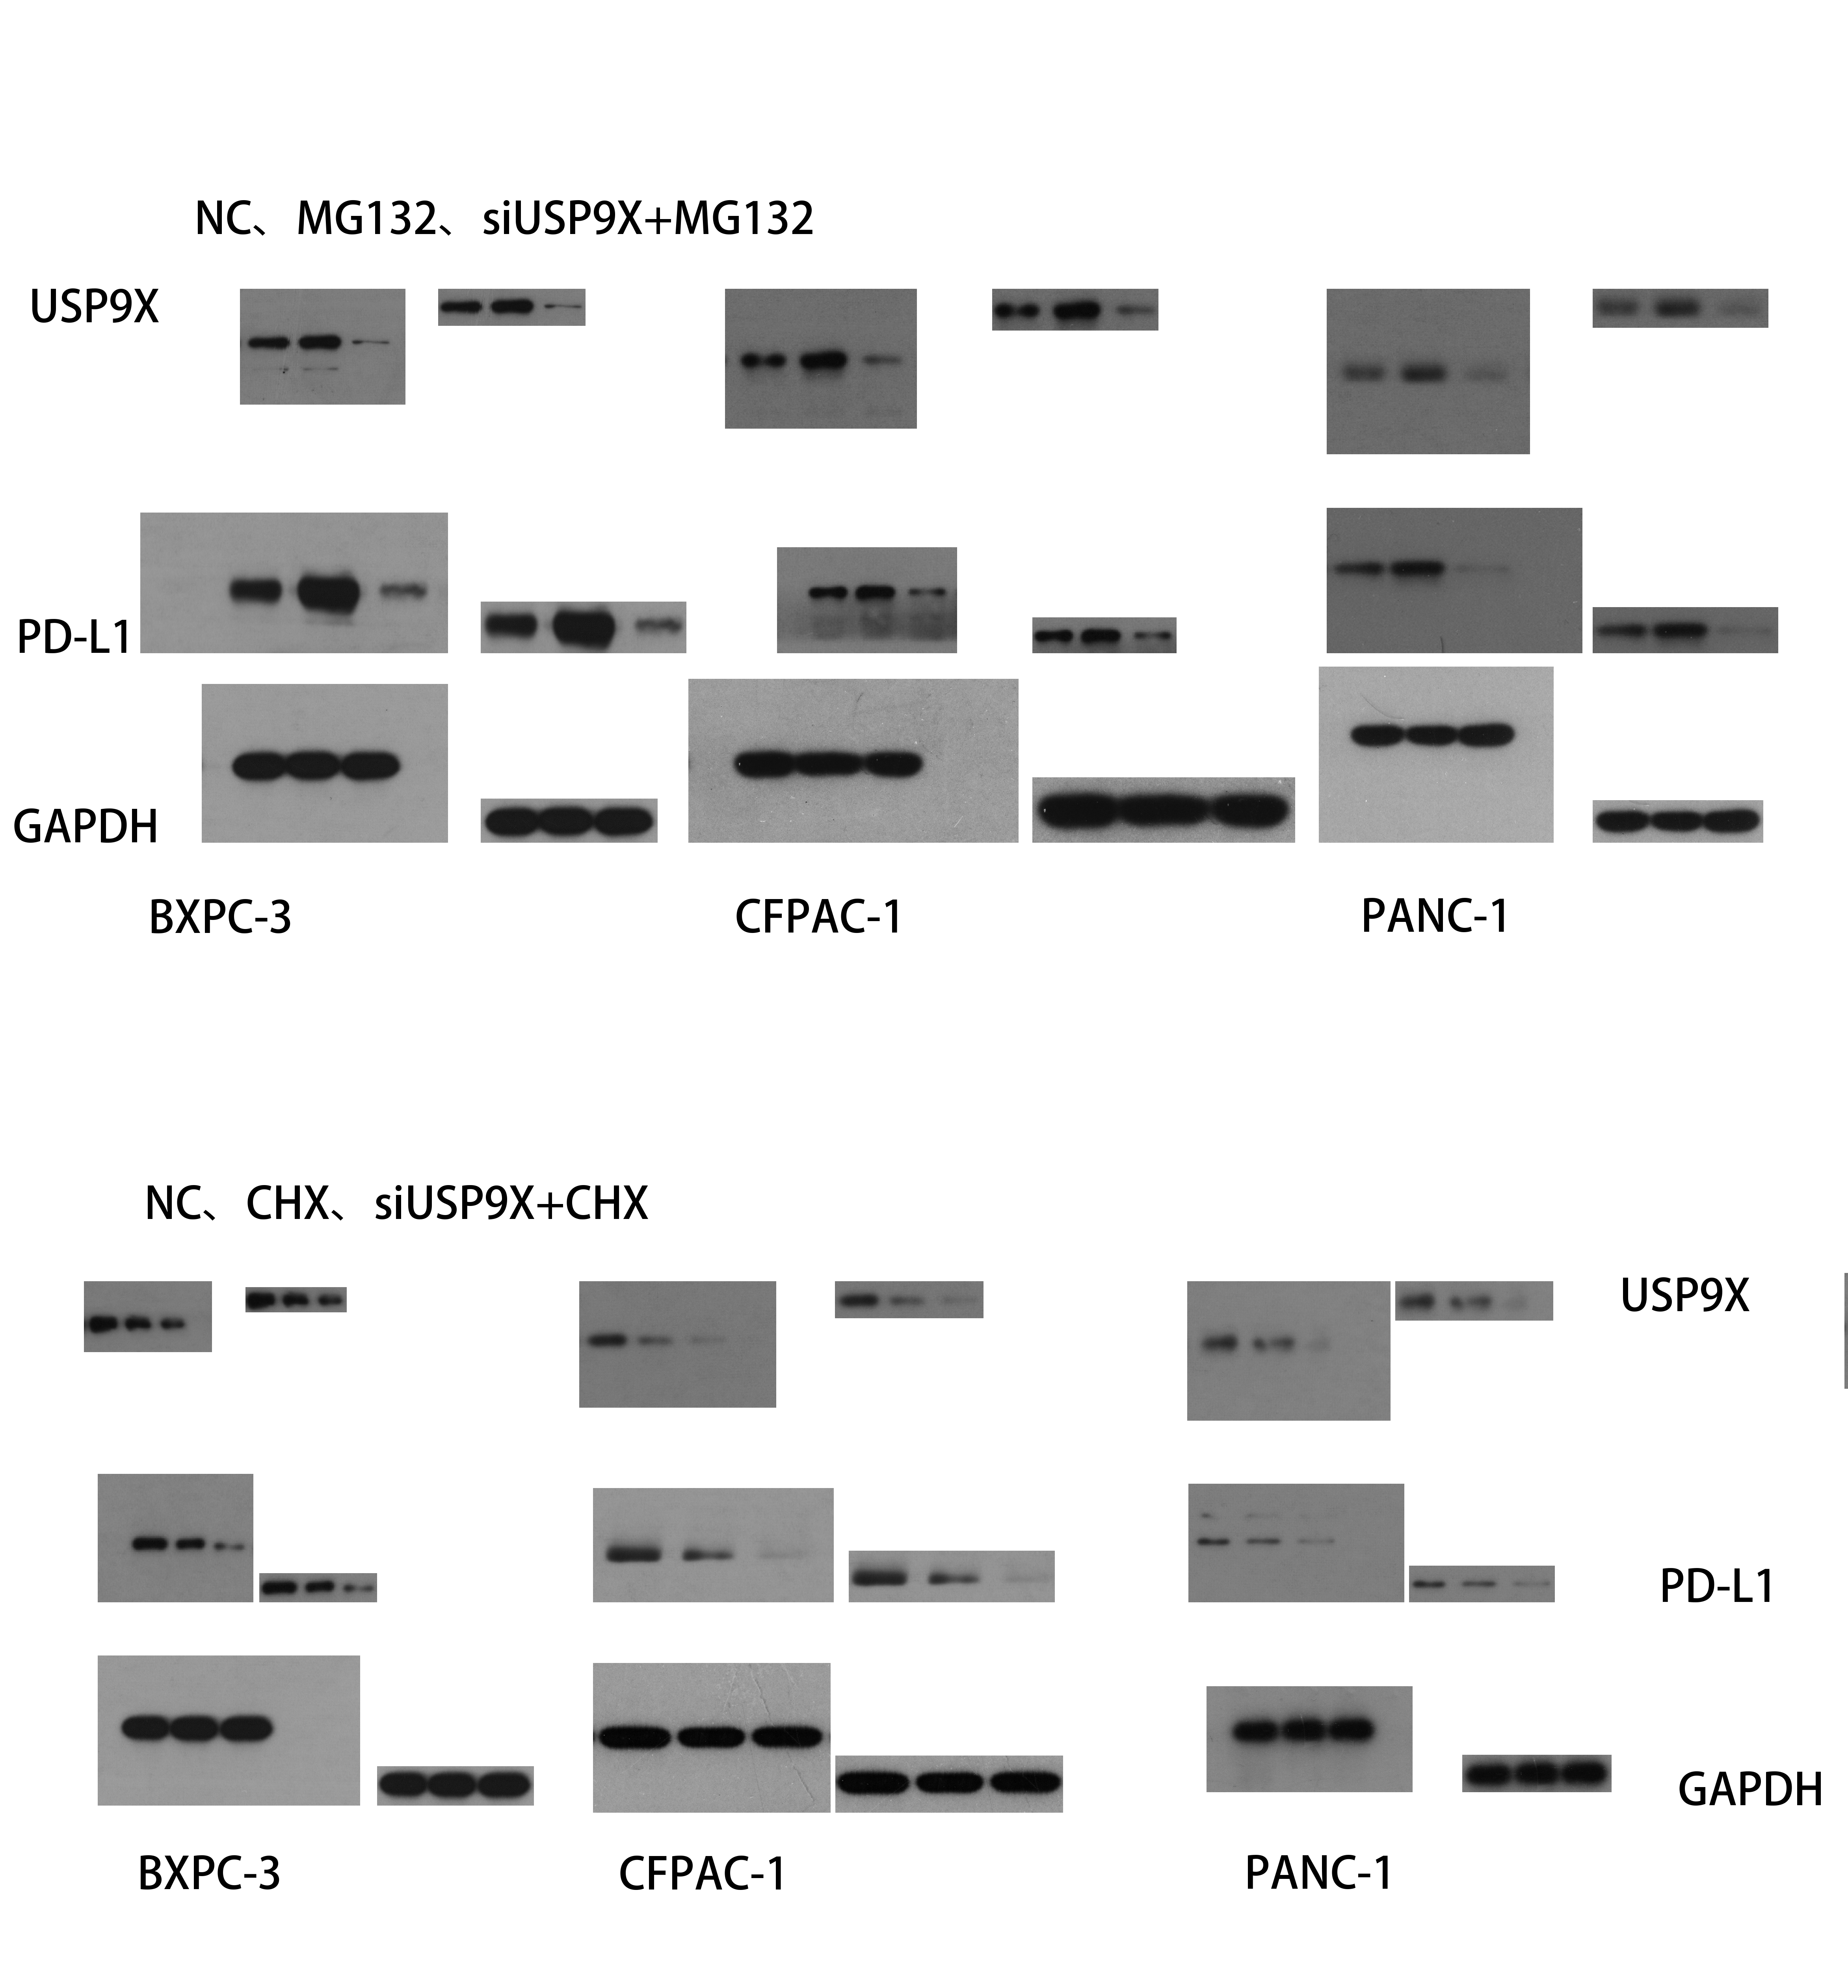


F2 E


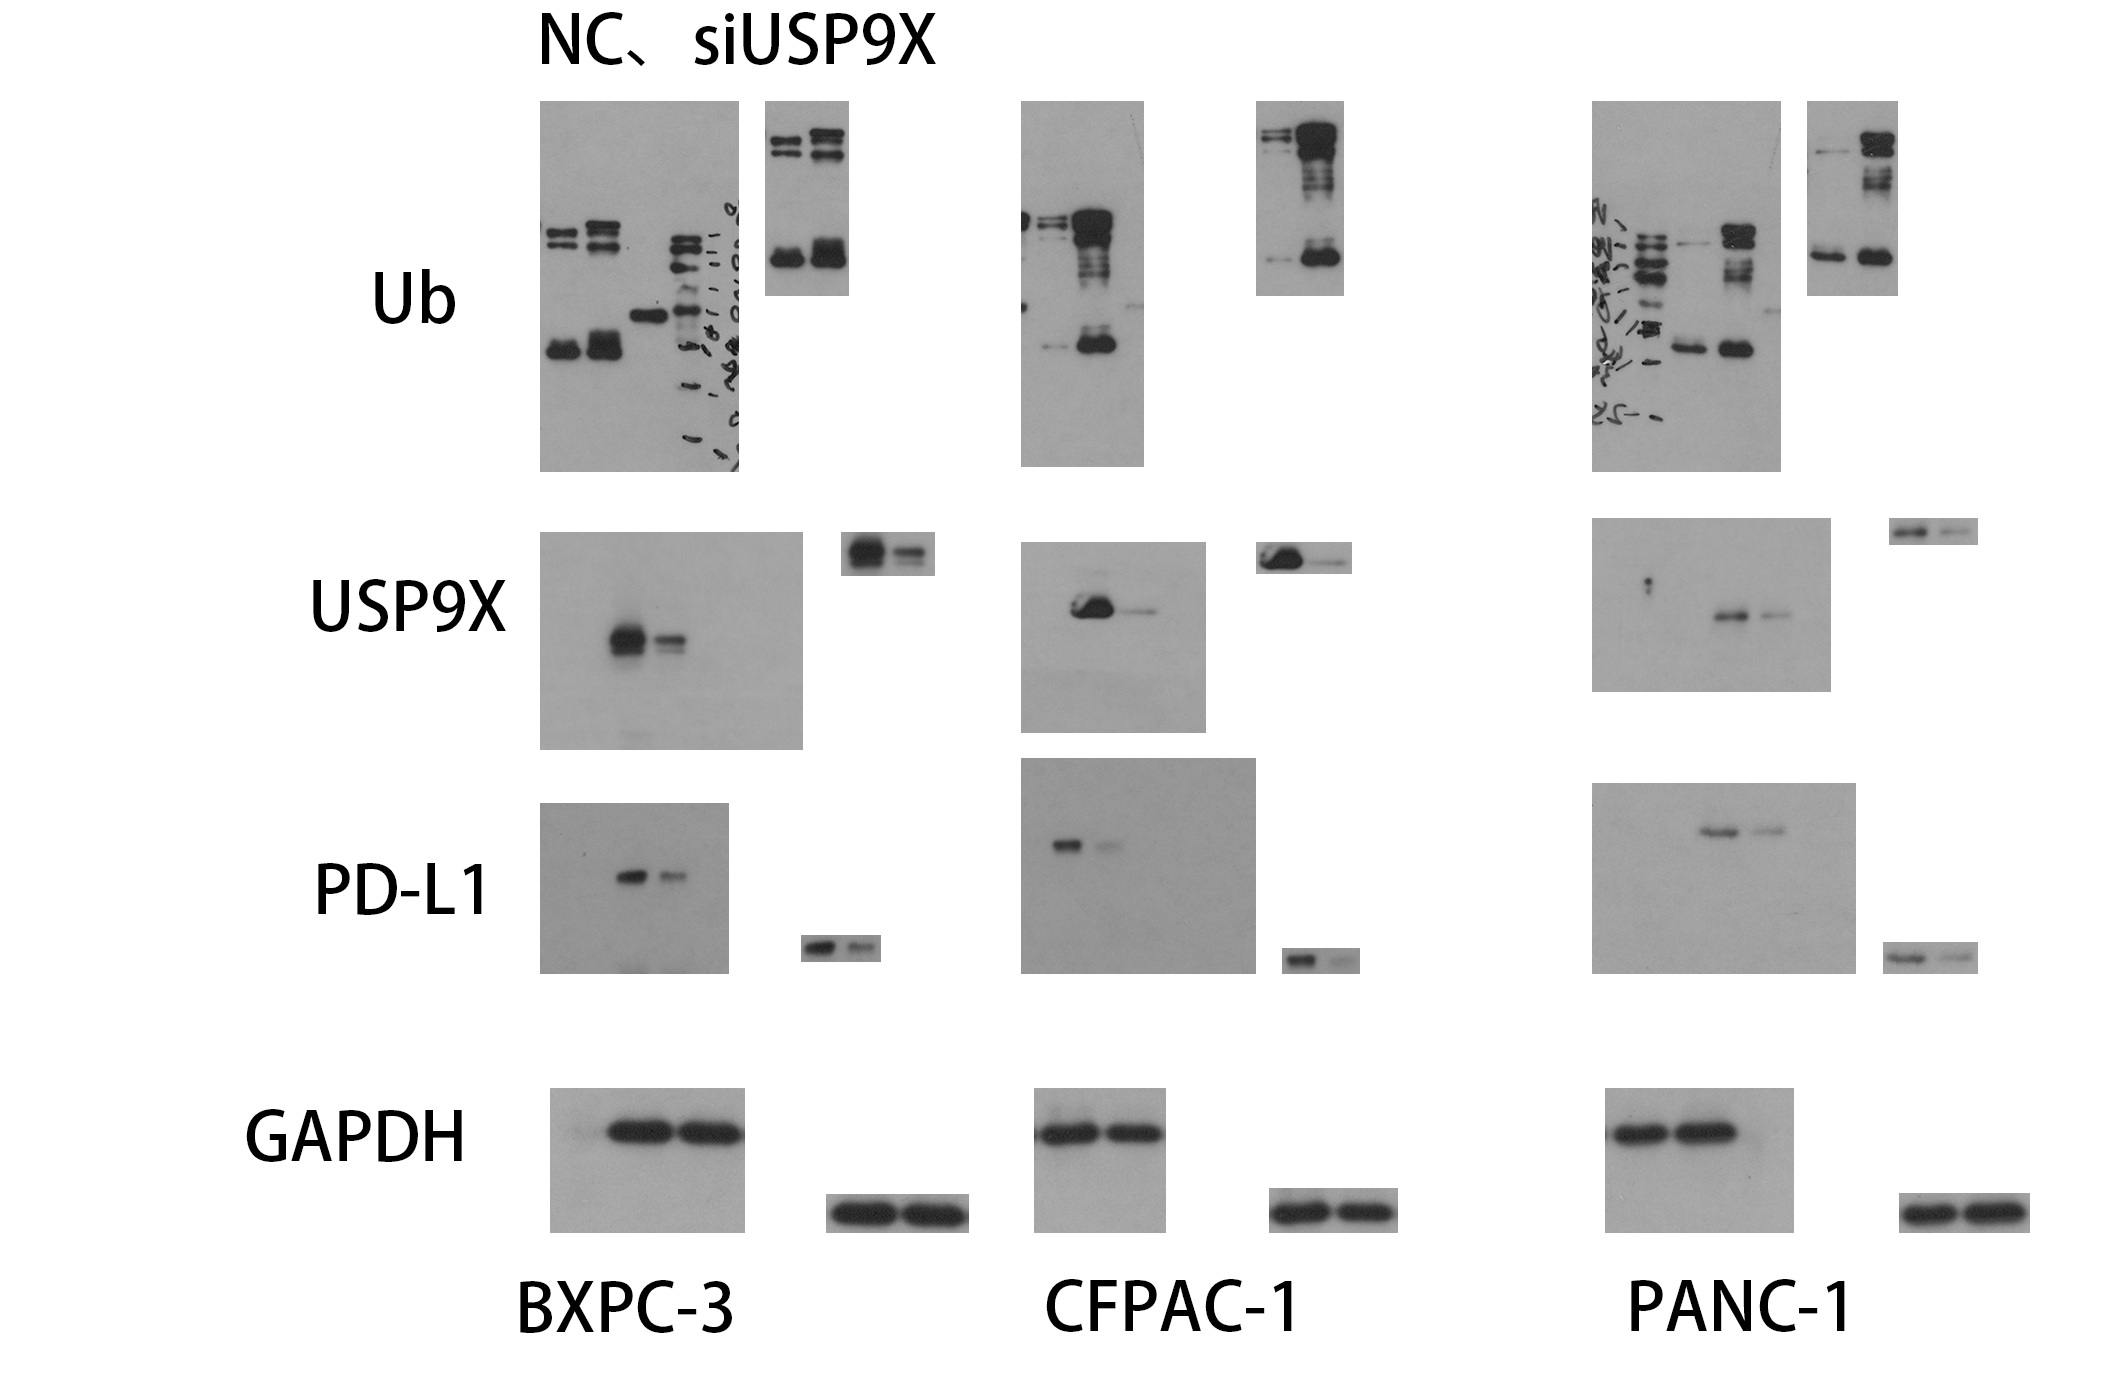


F3 D


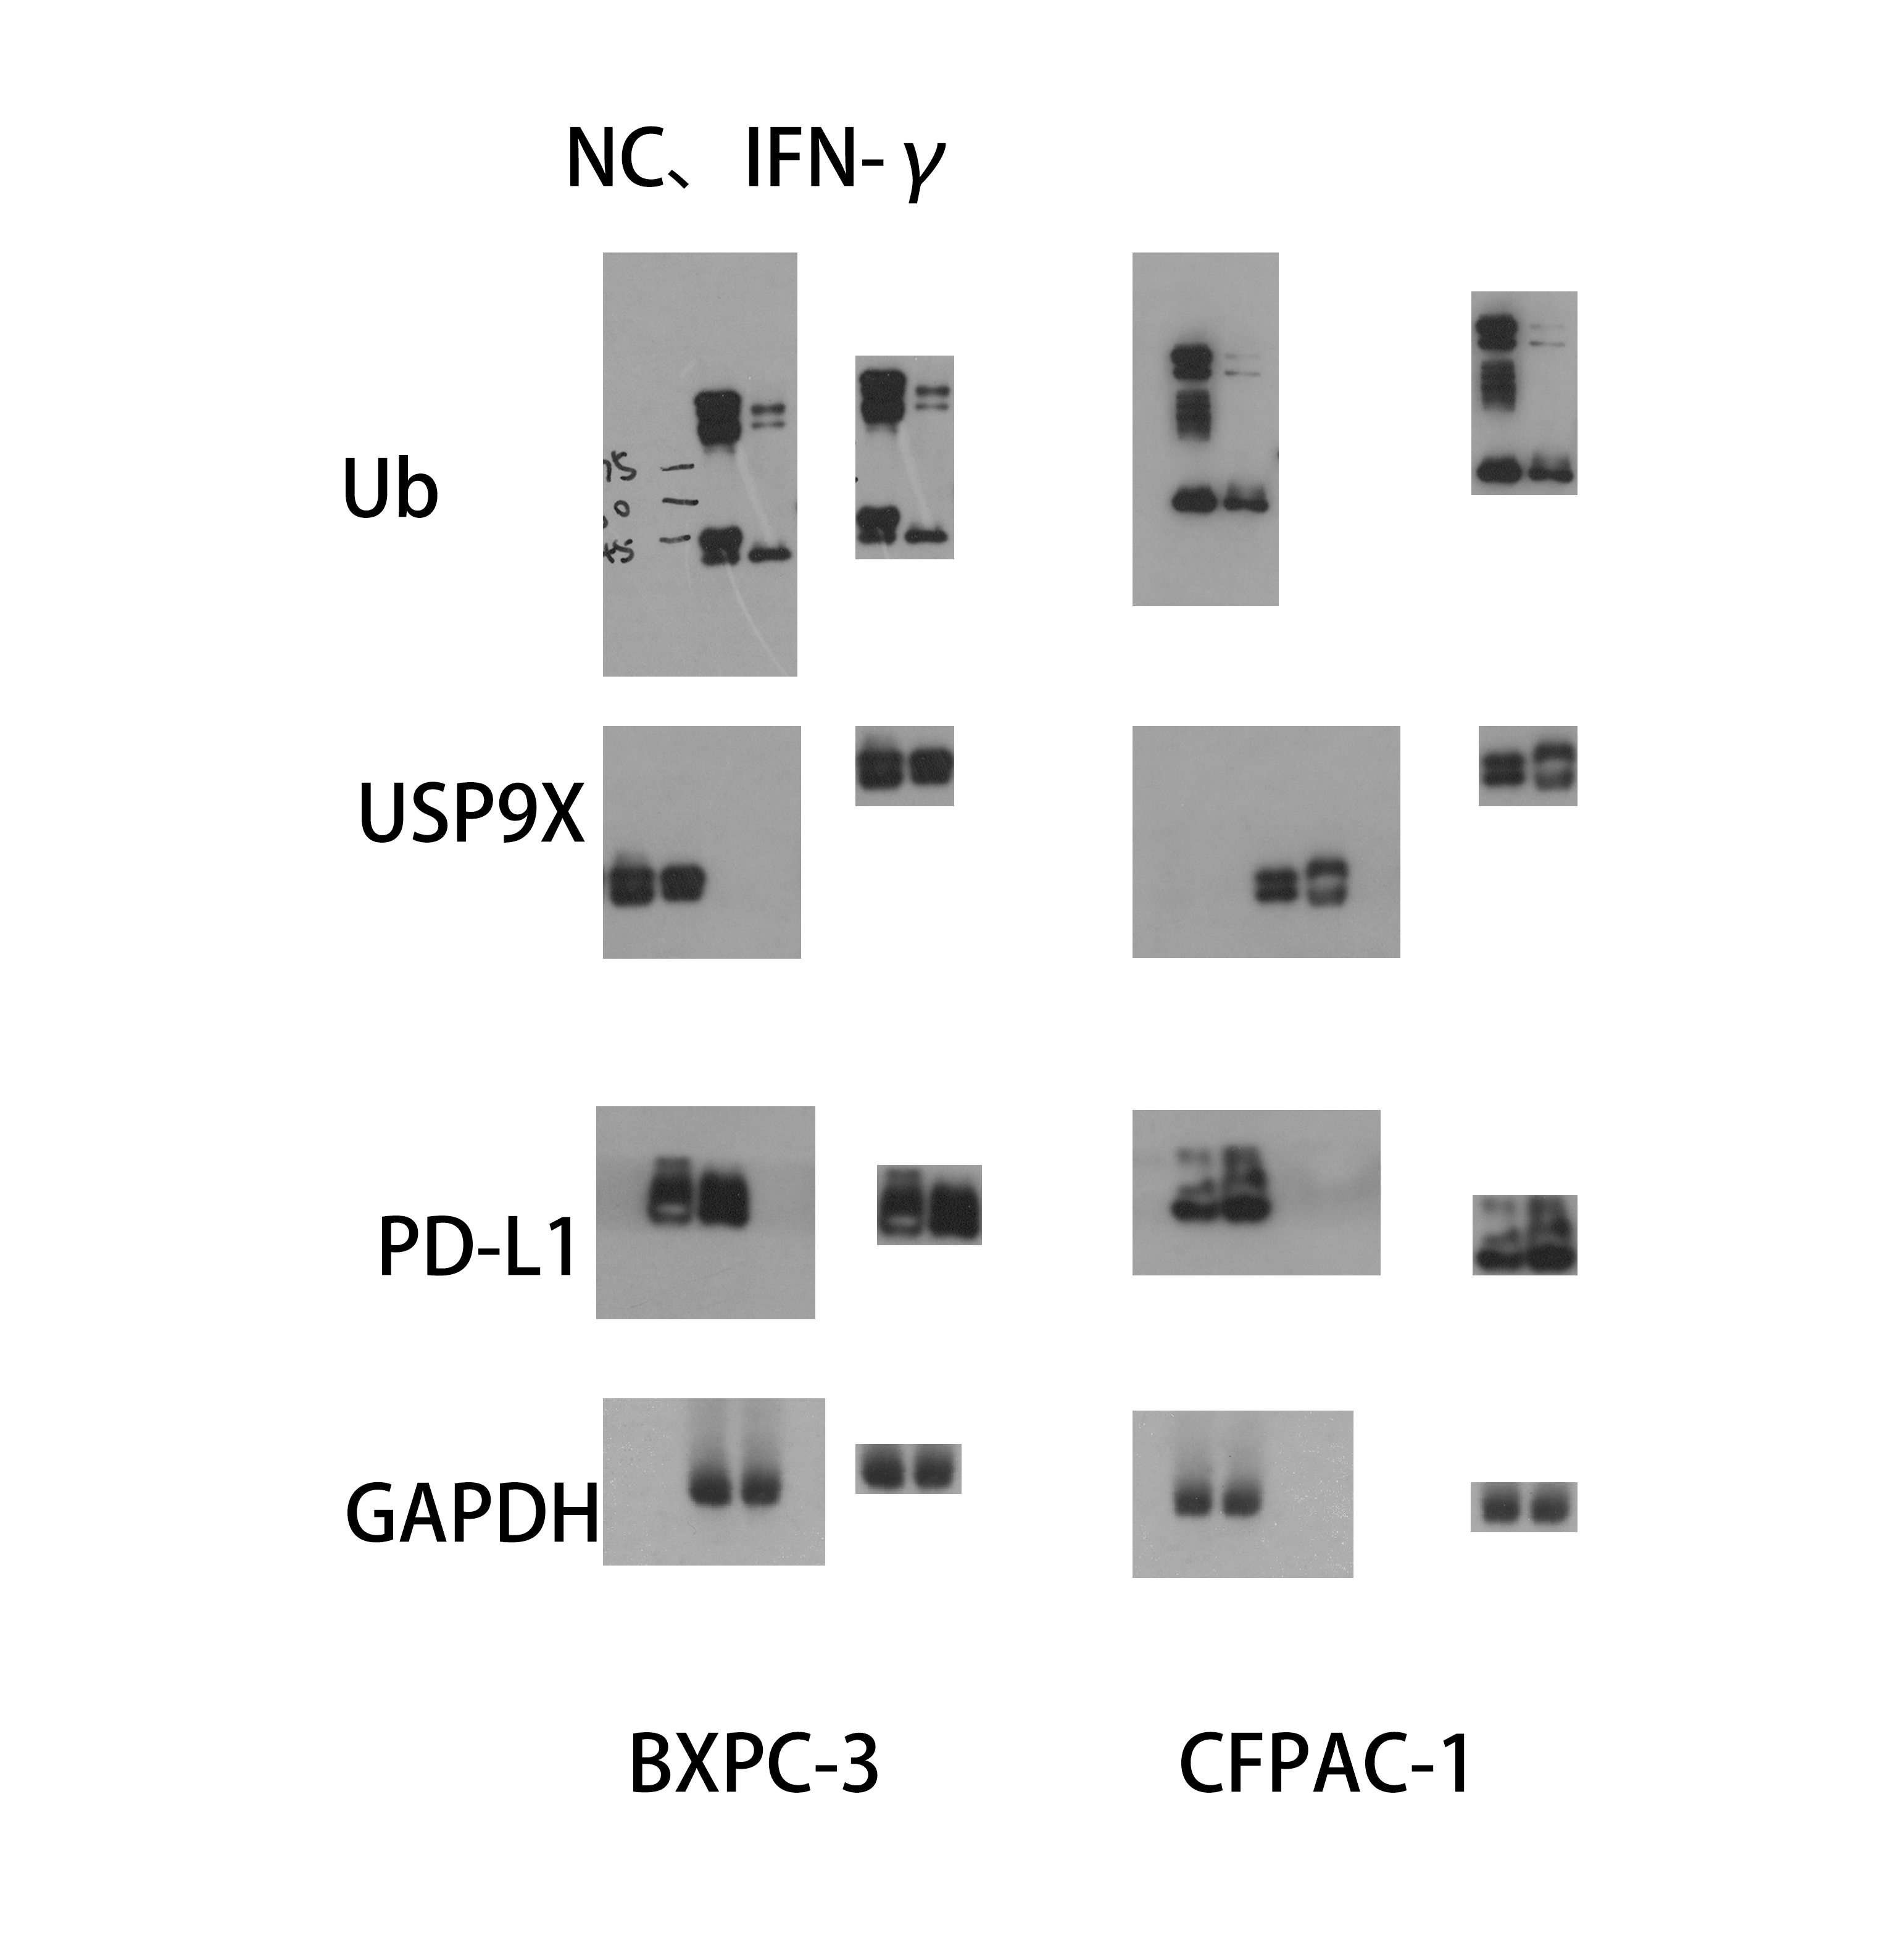


FS1


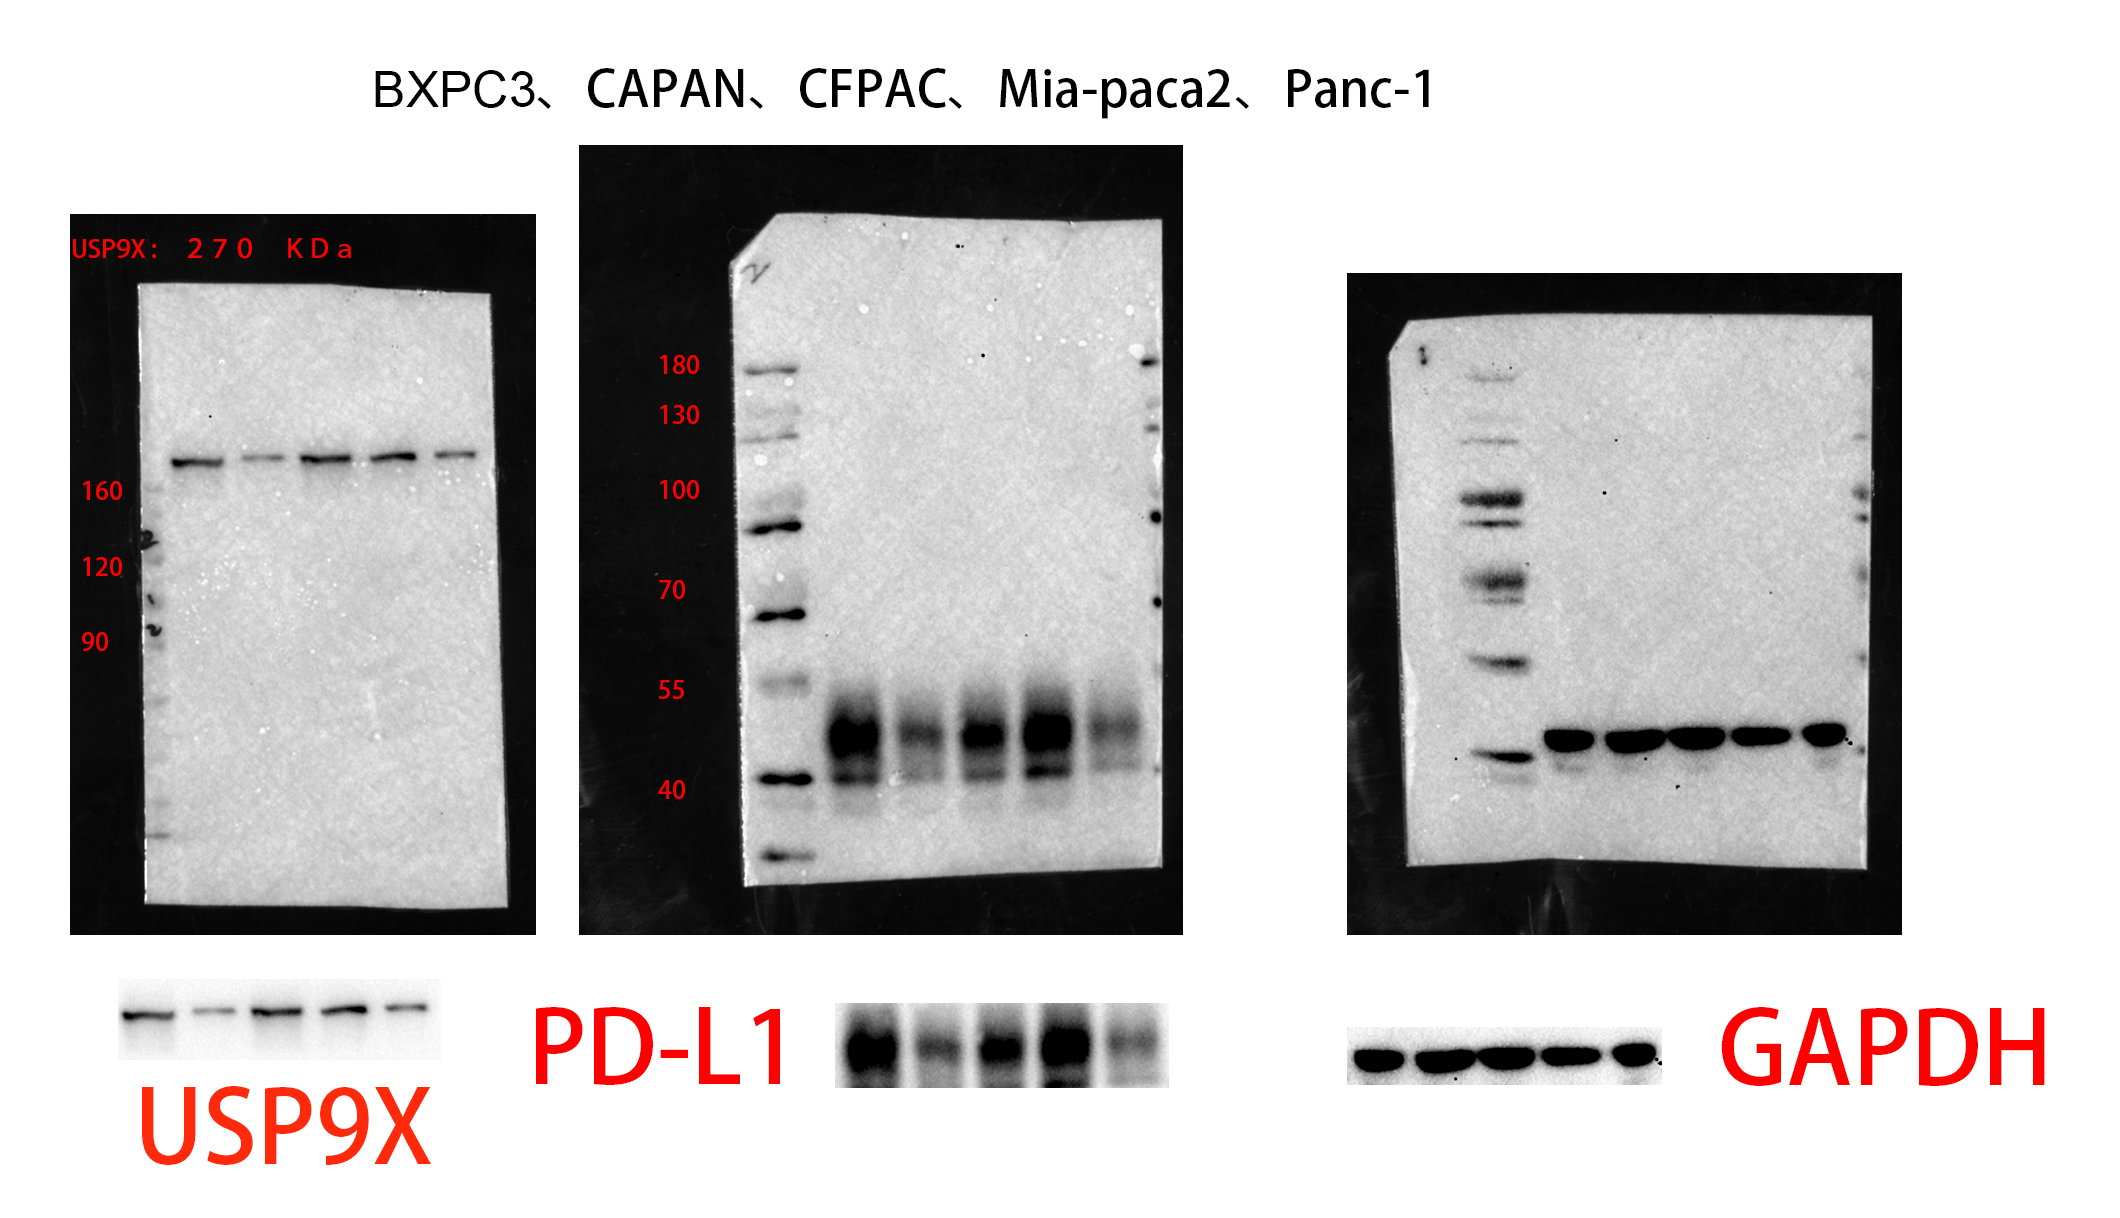

Supplement: Supplementary file 1 [file 3210fc8e25effa2a0bc552f9.docx]
